# Supplementary material for: Synthesis and investigation of water-soluble anticoagulant warfarin/ferulic acid grafted rare earth oxide nanoparticle materials
Source: Royal Society of Chemistry journal article supplement (doi:10.1039/c4ra14633f), 2015-01-01
Supplement: c4ra14633f1.pdf [file c4ra14633f1.pdf]

# Synthesis and Investigation of Water-soluble Anticoagulant Warfarin/Ferulic Acid grafted Rare Earth oxides Nanoparticles Materials

## Supporting Materials

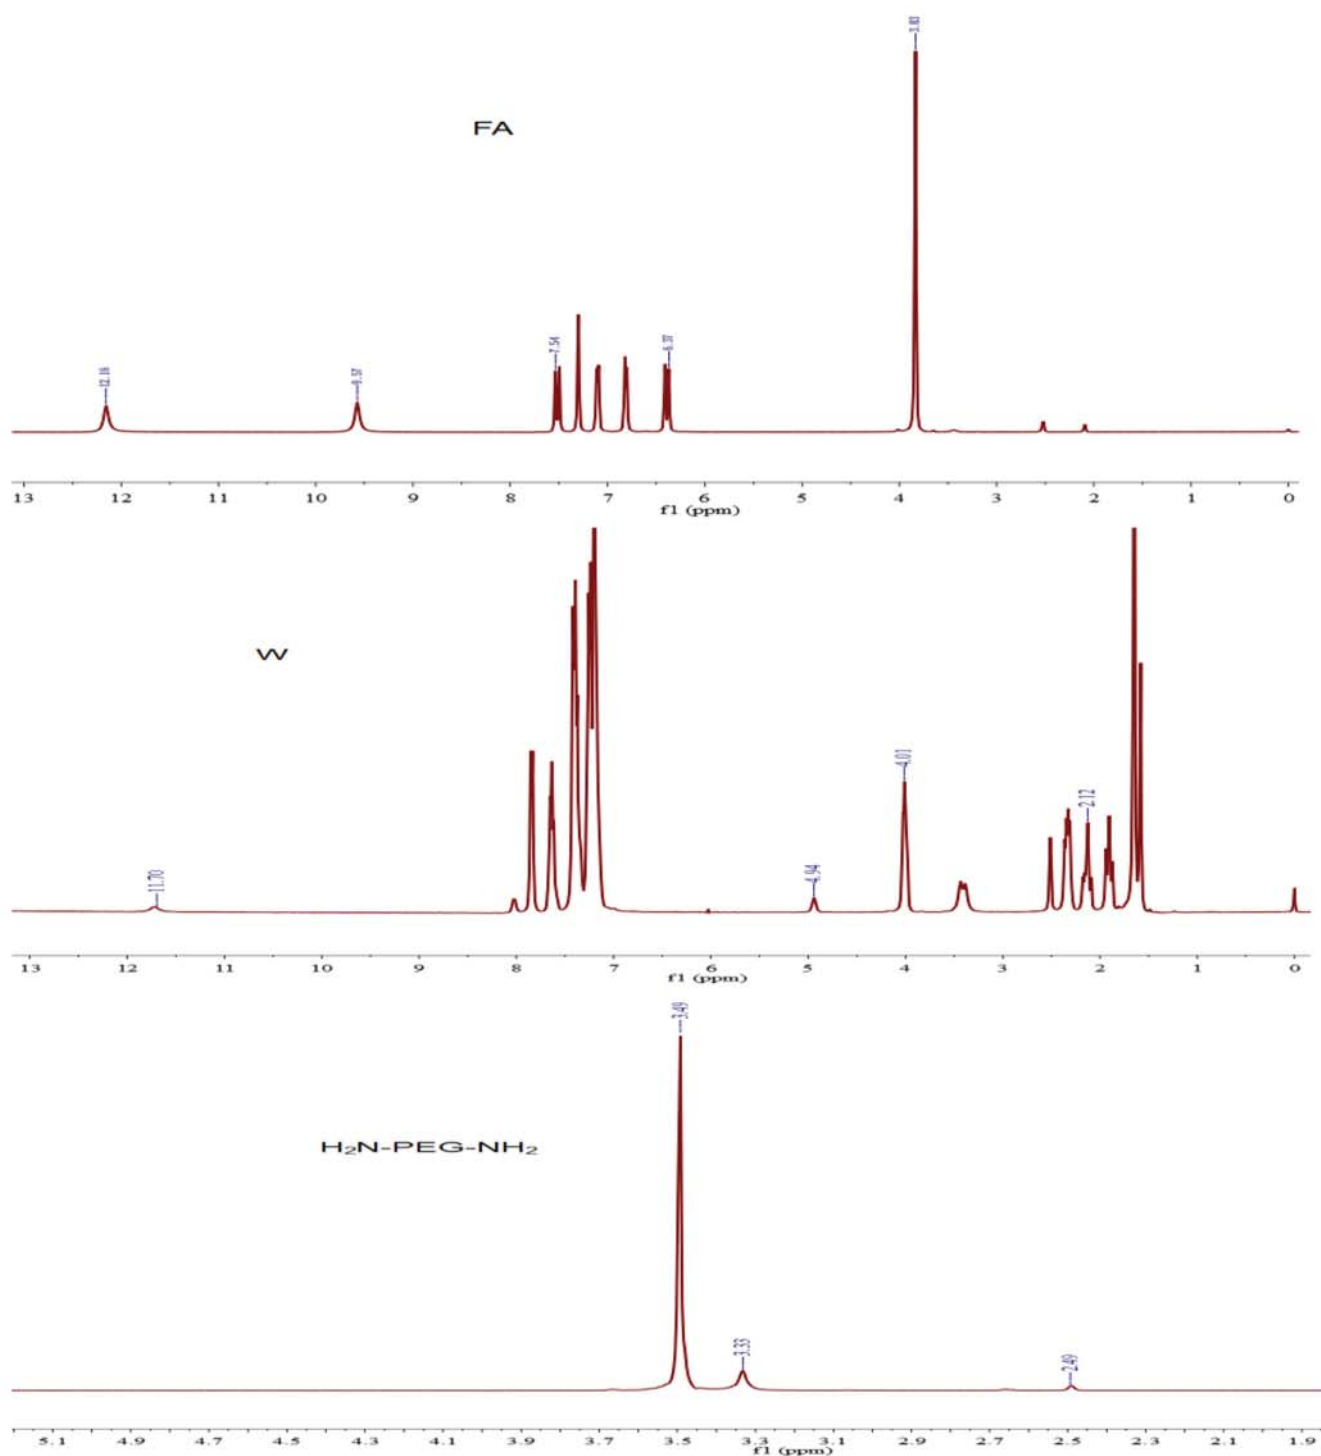

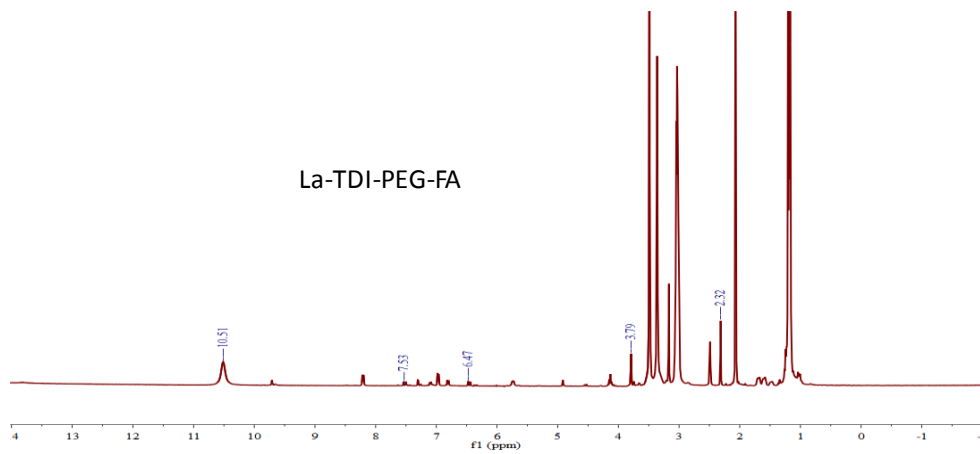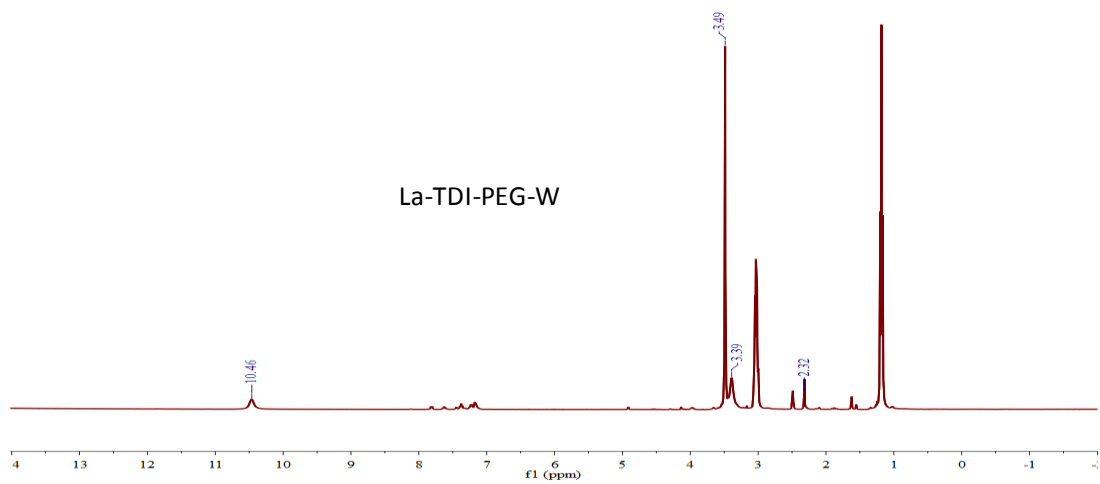

**<sup>1</sup>H NMR of warfarin, ferulic acid and their compounds**

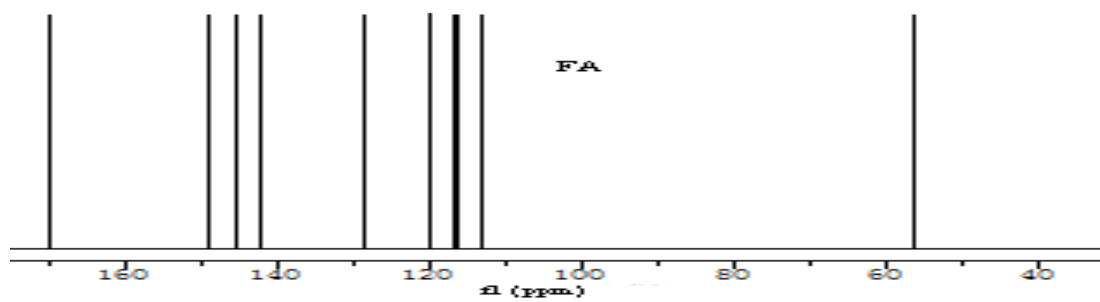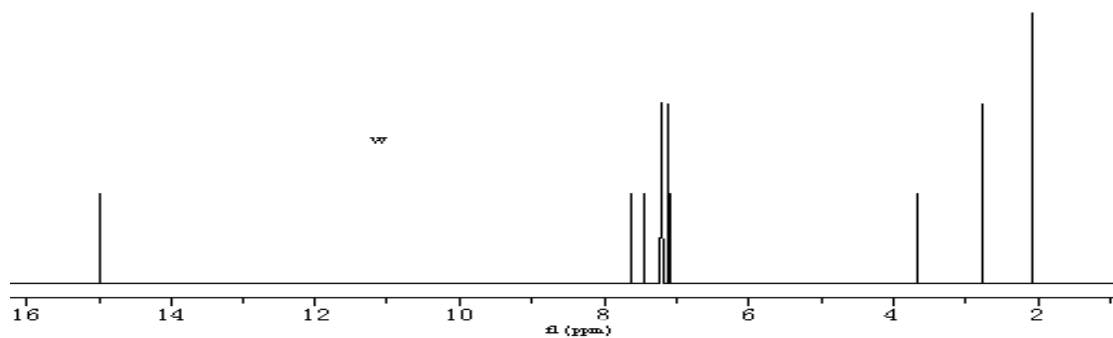

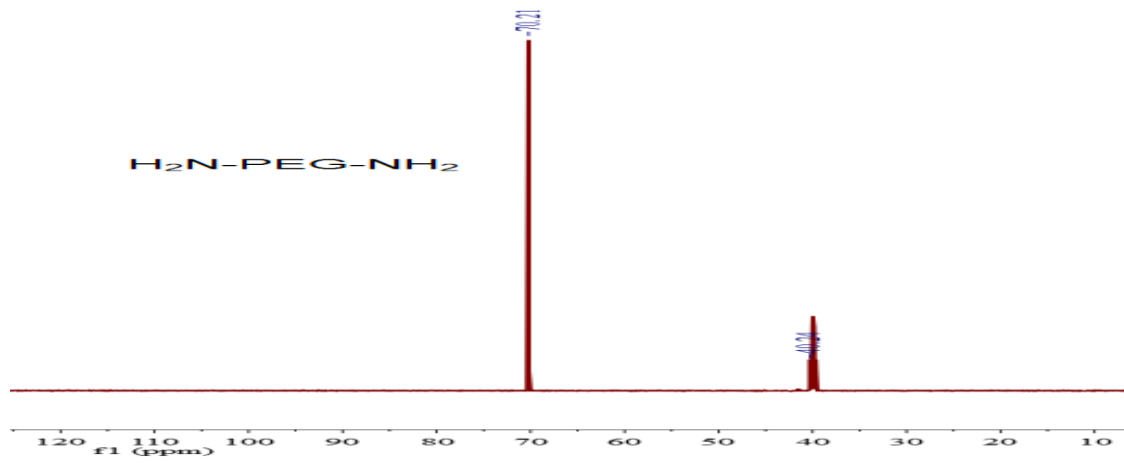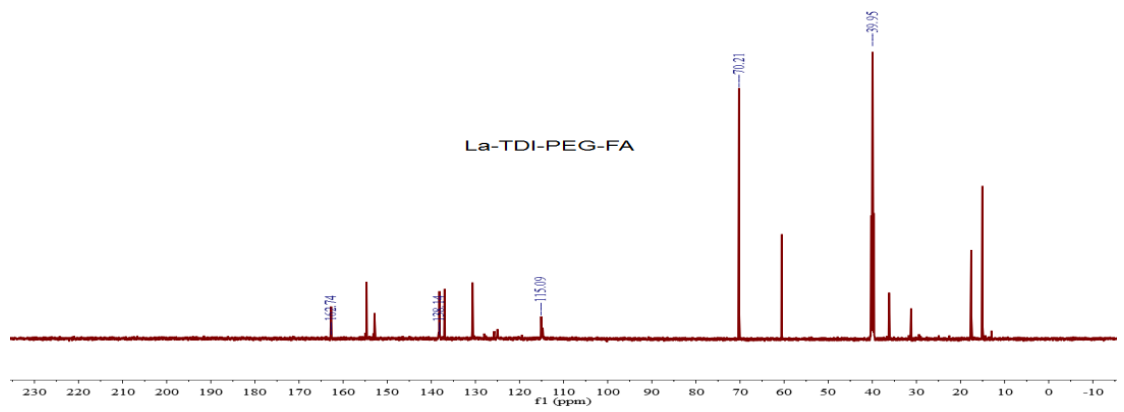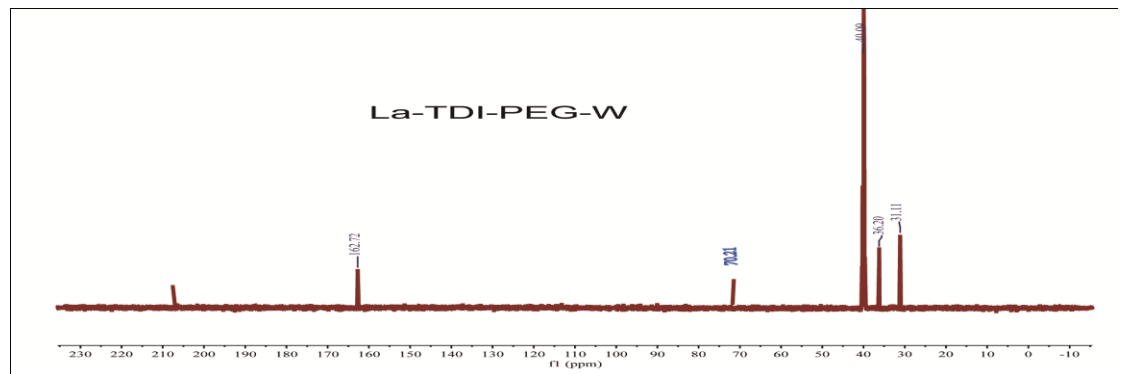

<sup>13</sup>C NMR of warfarin, ferulic acid and their compounds
